# Supplementary material for: A headspace collection chamber for whole body volatilomics
Source: Royal Society of Chemistry journal article supplement (doi:10.1039/d2an01227h), 2022-01-01
Supplement: d2an01227h1.pdf [file d2an01227h1.pdf]

## **Supplementary Information**

### **A headspace collection chamber for whole body volatilomics**

**Stephanie Rankin-Turner<sup>1</sup>, Conor J. McMeniman<sup>1,2\*</sup>**

<sup>1</sup> W. Harry Feinstone Department of Molecular Microbiology and Immunology, Johns Hopkins Malaria Research Institute, Johns Hopkins Bloomberg School of Public Health, Johns Hopkins University, Baltimore, MD 21205, USA.

<sup>2</sup> The Solomon H. Snyder Department of Neuroscience, Johns Hopkins University School of Medicine, Baltimore, MD 21205, USA.

\* Correspondence to: [cmcmeni1@jhu.edu](mailto:cmcmeni1@jhu.edu)

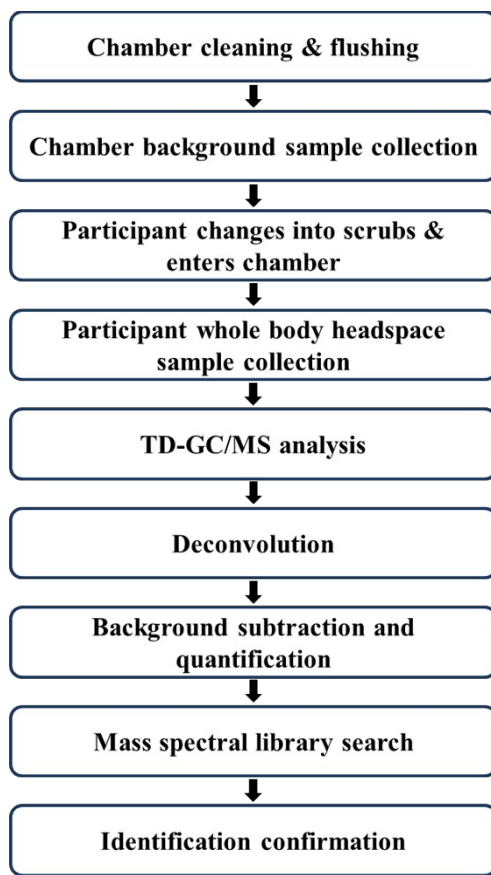

**Figure S1.** Schematic of the experimental workflow.

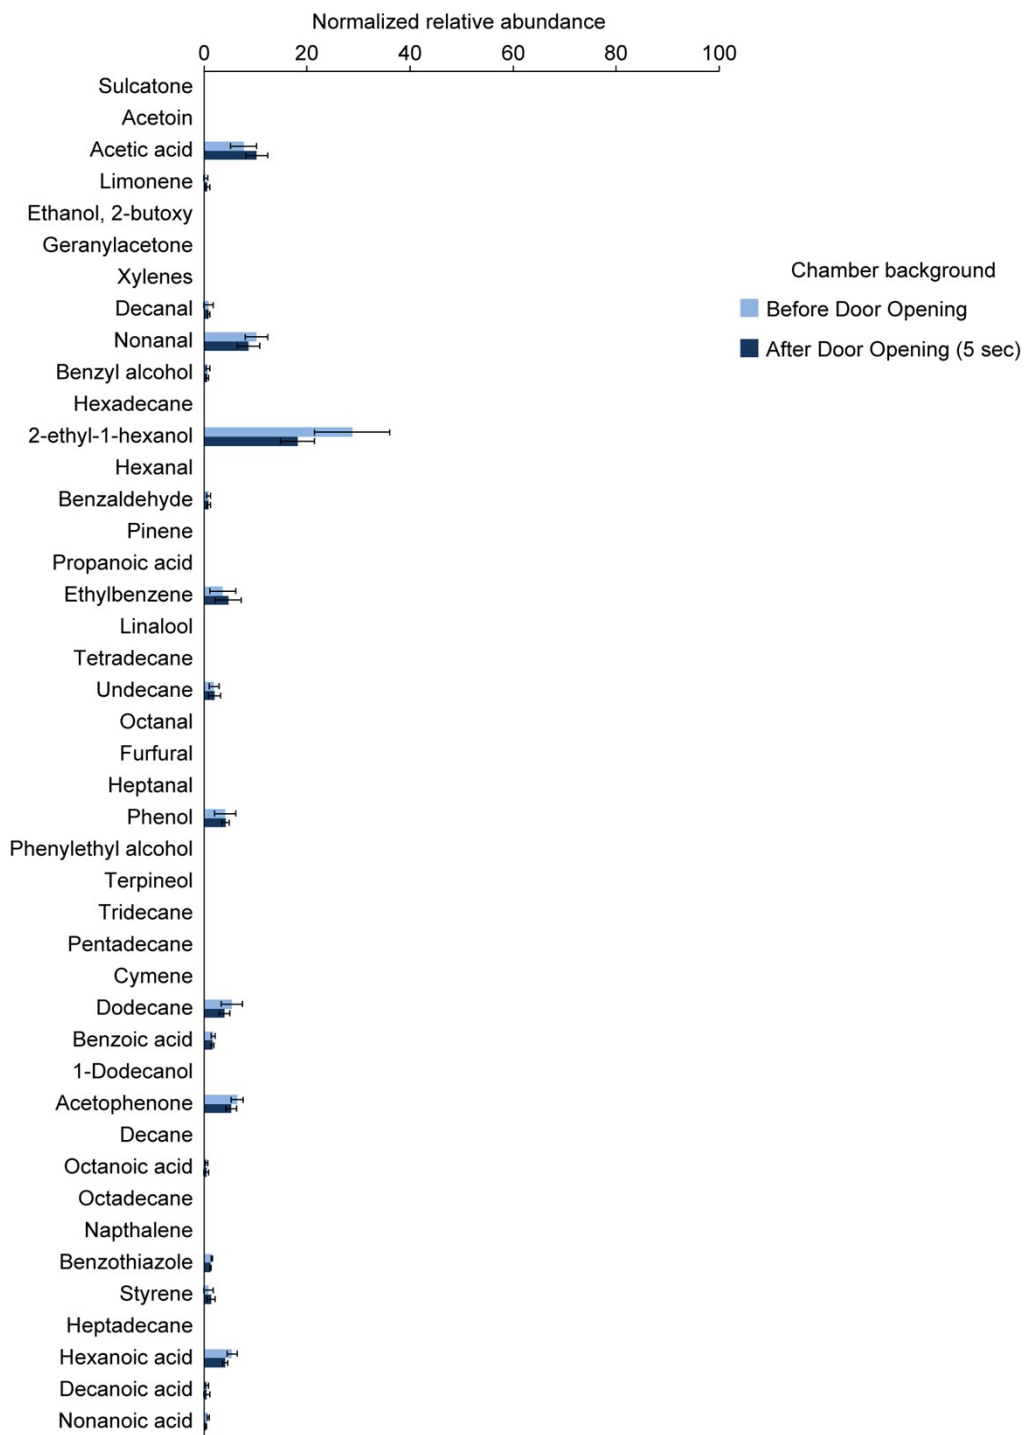

**Figure S2.** Normalized abundance of background traces of all human VOCs detected in the chamber background before and after opening the chamber door for 5 seconds. The majority of human VOCs were not detected in the background traces. Normalized to internal standard, standard error bars, n = 3.

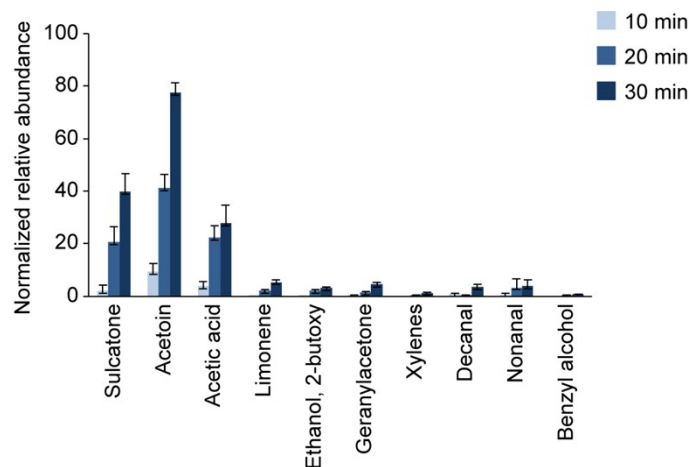

**Figure S3.** Normalized abundance of ten most abundant human VOCs sampled for 10, 20 and 30 minutes from a single participant. Normalized to internal standard, standard error bars, n = 3.

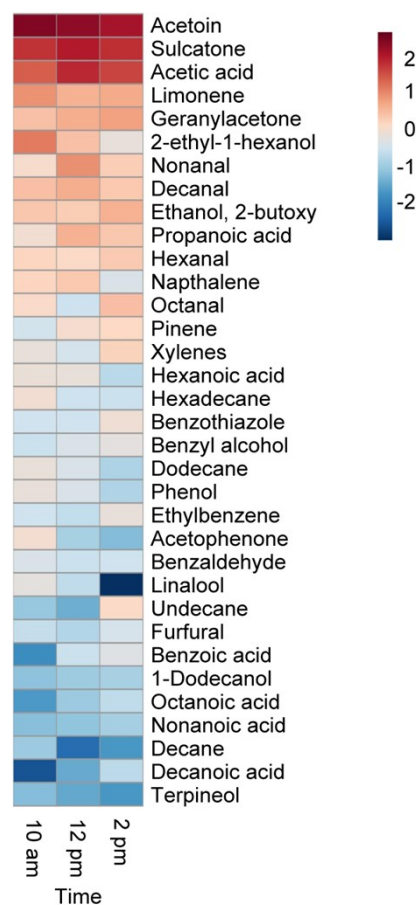

**Figure S4.** Human whole body odor sampled from a single participant at 10am, 12pm and 2pm. Normalized to internal standard. n = 3 for 10 and 20 minute timepoints, n = 6 for 30 minute timepoints.

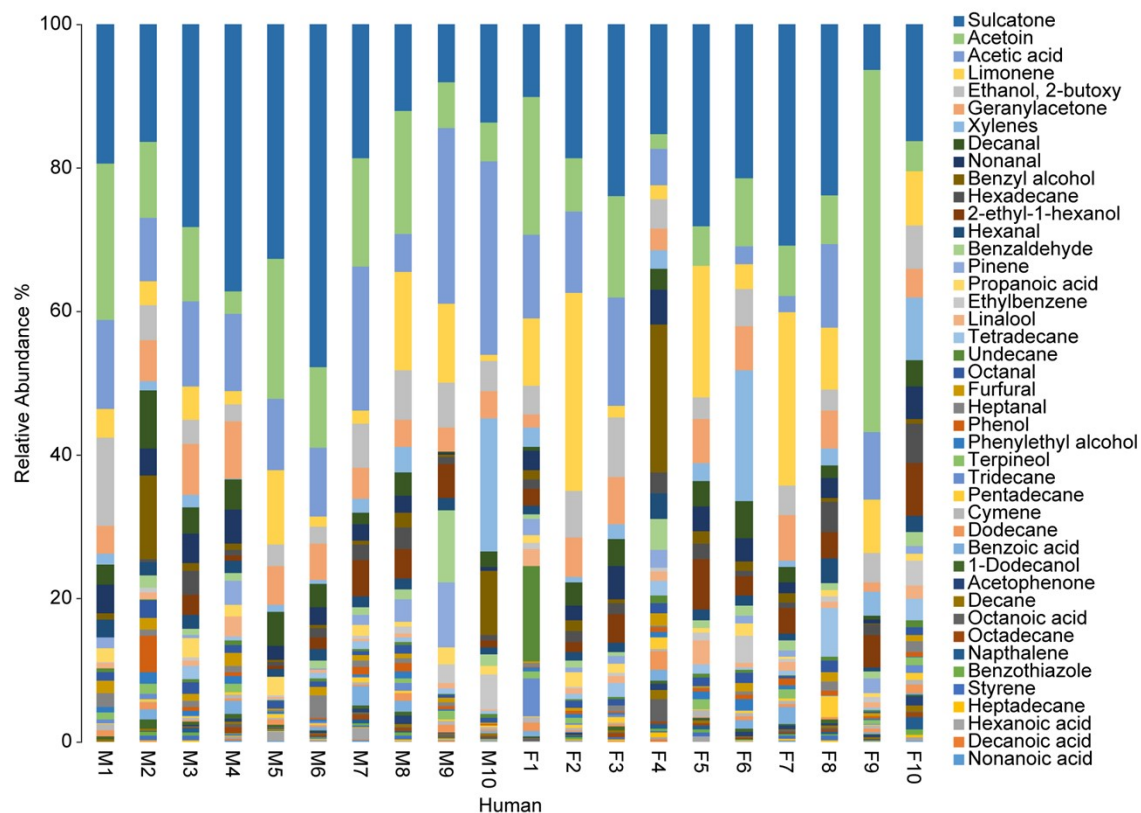

**Figure S5.** Relative abundances of 43 volatile organic compounds detected in whole body headspace from humans. Columns represent relative VOC signatures from individual humans, with compounds organized approximately from most to least abundant. n = 20 participants. M = male, F = female.

**Table S1.** Sampling chamber and blood oxygen levels across 10 participants at the start (0 mins) and end (30 mins) of whole body headspace sampling.

| <b>Participant</b> | <b>Sex</b> | <b>Weight (kg)</b> | <b>Starting Chamber O2 (%)</b> | <b>Ending Chamber O2 (%)</b> | <b>Chamber O2 Change (%)</b> | <b>Starting SpO2 (%)</b> | <b>Ending SpO2 (%)</b> | <b>SpO2 Change (%)</b> |
|--------------------|------------|--------------------|--------------------------------|------------------------------|------------------------------|--------------------------|------------------------|------------------------|
| 1                  | Female     | 48                 | 20.9                           | 20.9                         | 0                            | 99                       | 98                     | -1                     |
| 2                  | Male       | 111                | 20.9                           | 20.3                         | 0.6                          | 95                       | 97                     | +2                     |
| 3                  | Male       | 79                 | 20.9                           | 20.9                         | 0                            | 98                       | 97                     | -1                     |
| 4                  | Female     | 68                 | 20.9                           | 20.9                         | 0                            | 97                       | 97                     | 0                      |
| 5                  | Female     | 68                 | 20.9                           | 20.9                         | 0                            | 99                       | 97                     | -2                     |
| 6                  | Female     | 45                 | 20.9                           | 20.9                         | 0                            | 97                       | 98                     | +1                     |
| 7                  | Female     | 61                 | 20.9                           | 20.9                         | 0                            | 99                       | 98                     | -1                     |
| 8                  | Female     | 59                 | 20.9                           | 20.9                         | 0                            | 97                       | 98                     | +1                     |
| 9                  | Female     | 61                 | 20.9                           | 20.9                         | 0                            | 99                       | 98                     | -1                     |
| 10                 | Male       | 67                 | 20.9                           | 20.9                         | 0                            | 98                       | 98                     | 0                      |

**Table S2.** Cohort metadata including sex, height, weight, smoking/vaping behavior, sampling time, CO<sub>2</sub> emission rate, total CO<sub>2</sub> concentration in the headspace collection chamber at the end of 30 min sampling period, and the mean number of MS features detected in background (BG) and whole body (WB) headspace (inclusive of background) from each participant. The mean number of MS features from WB samples with NIST library hits are denoted.

| Participant | Sex    | Height (cm) | Weight (kg) | Smokes/Vapes       | Sampling Time | CO <sub>2</sub> Emissions (ppm/min) | CO <sub>2</sub> Total Concentration (ppm) | Mean BG Features | Mean WB Features | Mean WB Features with NIST Hits |
|-------------|--------|-------------|-------------|--------------------|---------------|-------------------------------------|-------------------------------------------|------------------|------------------|---------------------------------|
| M1          | Male   | 192         | 113         | No                 | 10:00         | 197                                 | 6407                                      | 913              | 1140             | 371                             |
| M2          | Male   | 185         | 82          | No                 | 10:00         | 147                                 | 4834                                      | 940              | 1110             | 358                             |
| M3          | Male   | 180         | 73          | No                 | 10:00         | 139                                 | 4601                                      | 934              | 1079             | 352                             |
| M4          | Male   | 186         | 76          | Occasionally vapes | 10:00         | 132                                 | 4349                                      | 869              | 1030             | 333                             |
| M5          | Male   | 173         | 64          | No                 | 13:00         | 157                                 | 5096                                      | 711              | 827              | 274                             |
| M6          | Male   | 183         | 68          | No                 | 10:00         | 119                                 | 3986                                      | 733              | 797              | 269                             |
| M7          | Male   | 183         | 73          | No                 | 12:00         | 117                                 | 3913                                      | 716              | 882              | 293                             |
| M8          | Male   | 185         | 104         | No                 | 9:00          | 196                                 | 6317                                      | 780              | 945              | 319                             |
| M9          | Male   | 178         | 91          | No                 | 10:00         | 154                                 | 5057                                      | 863              | 945              | 322                             |
| M10         | Male   | 173         | 77          | No                 | 9:00          | 140                                 | 4648                                      | 824              | 907              | 306                             |
| F1          | Female | 168         | 64          | No                 | 10:00         | 116                                 | 3934                                      | 892              | 1093             | 355                             |
| F2          | Female | 176         | 64          | No                 | 10:00         | 134                                 | 4409                                      | 888              | 1110             | 373                             |
| F3          | Female | 163         | 68          | No                 | 10:00         | 126                                 | 4186                                      | 905              | 1046             | 341                             |
| F4          | Female | 178         | 78          | No                 | 9:00          | 119                                 | 3984                                      | 849              | 1030             | 339                             |
| F5          | Female | 158         | 50          | No                 | 9:00          | 89                                  | 3130                                      | 811              | 965              | 324                             |

|     |        |     |    |                       |       |     |      |     |      |     |
|-----|--------|-----|----|-----------------------|-------|-----|------|-----|------|-----|
| F6  | Female | 169 | 68 | No                    | 10:00 | 137 | 4567 | 844 | 1017 | 334 |
| F7  | Female | 178 | 68 | Occasionally<br>vapes | 10:00 | 149 | 4888 | 754 | 933  | 315 |
| F8  | Female | 157 | 60 | No                    | 13:00 | 104 | 3548 | 750 | 873  | 295 |
| F9  | Female | 165 | 69 | No                    | 10:00 | 104 | 3581 | 808 | 965  | 322 |
| F10 | Female | 163 | 88 | No                    | 10:00 | 126 | 4207 | 640 | 960  | 319 |
